# Supplementary material for: Facile one-pot synthesis of mesoporous carbon and N-doped carbon for CO2 capture by a novel melting-assisted solvent-free method
Source: Royal Society of Chemistry journal article supplement (doi:10.1039/c5ta06465a), 2015-01-01
Supplement: c5ta06465a1.pdf [file c5ta06465a1.pdf]

## Electronic Supplementary Information

---

### One-Pot Facile Synthesis of Mesoporous Carbon and N-doped Carbon for CO<sub>2</sub> Capture by a Novel Melting-Assisted Solvent-Free Method

Zhongzheng Zhang,<sup>†</sup> Baodeng Wang,<sup>†</sup> Chenming Zhu,<sup>†</sup> Peng Gao,<sup>†</sup>

Zhiyong Tang,<sup>†</sup> Nannan Sun,<sup>\*,†</sup> Wei Wei<sup>\*,†,‡</sup> and Yuhan Sun<sup>†,‡</sup>

<sup>†</sup> CAS Key Laboratory of Low-Carbon Conversion Science and Engineering, Shanghai Advanced Research Institute, Chinese Academy of Science, Shanghai 201203, China

<sup>‡</sup> School of Physical Science and Technology, ShanghaiTech University, Shanghai 201210, China

\*Corresponding author: E-mail: weiwei@sari.ac.cn (W. Wei); sunnn@sari.ac.cn (N. Sun)

**Section I:** Small angle XRD pattern of NMC-250D8H

**Section II:** Calculation of adsorption heat of CO<sub>2</sub> on MC-250D8H and NMC-250D8H

**Section III:** Calculation of adsorption selectivity by Ideal Adsorption Solution Theory (IAST)

**Section I:** Small angle XRD pattern of NMC-250D8H

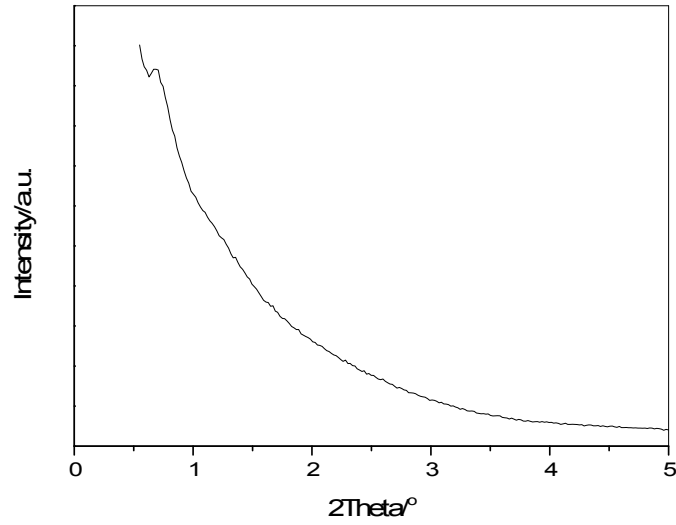

Fig.S1 Small angle XRD pattern of NMC-250D8H

Compared with that of MC samples, the small angle XRD pattern of NMC-250D8H sample does not show any diffraction peaks, indicating the mesostructure of NMC-250D8H is disordered.

## Section II: Calculation of adsorption heat of CO<sub>2</sub> on MC-250D8H and NMC-250D8H

The enthalpy of CO<sub>2</sub> adsorption on MC-250D8H and NMC-250D8H was calculated using a modified version of the Clausius-Clapeyron equation as shown in Eq.(1):

$$\ln\left(\frac{p_1}{p_2}\right) = \Delta H_{ads} \times \frac{T_2 - T_1}{R \times T_1 \times T_2} \quad (1)$$

where  $\Delta H_{ads}$  is the adsorption heat at specific loading (kJ/mol),  $T$  is the temperature (K),  $p$  is the pressure (bar), and  $R$  is the universal gas constant.

The isotherms of CO<sub>2</sub> at 0 and 25 °C on MC-250D8H and NMC-

250D8H (Fig.S2) were used to calculate the heat of adsorption. First, the Dual-Site Langmuir (DSL) model as defined by Eq. (2) was used to fit the isotherms:

$$n = q_{sat,A} \times \frac{b_A \times p}{1 + b_A \times p} + q_{sat,B} \times \frac{b_B \times p}{1 + b_B \times p} \quad (2)$$

where  $n$  is the adsorbed amount,  $q_{sat}$  is the saturation loading for site A and B,  $b$  is the Langmuir parameter associated with site A and B, and  $p$  is the pressure. The fitted parameters are displayed in Tal.S1.

Then, at a given adsorption amount, the equilibrium pressure at 0 and 25 °C can be solved out from the obtained fitted DSL equations. Finally, heats of adsorption can be obtained by adding these pressure values into Equ.(1). The calculated adsorption heats of CO<sub>2</sub> on MC-250D8H and NMC-250D8H at different adsorption amounts are listed in Tal.S2.

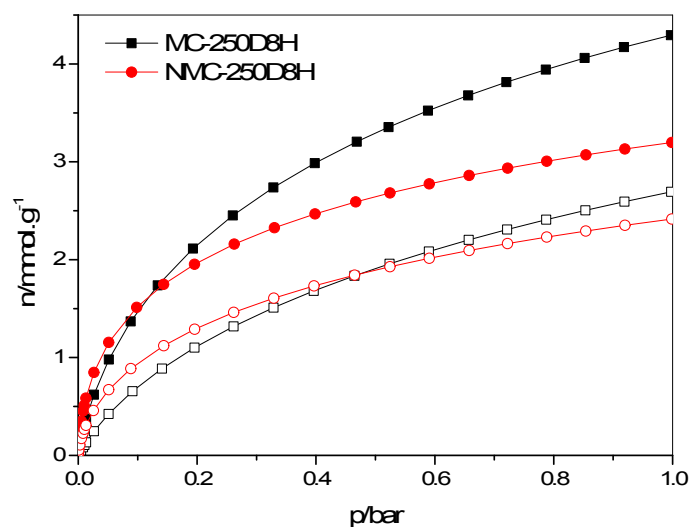

Fig.S2 CO<sub>2</sub> isotherms at 0 and 25 °C on MC-250D8H and NMC-250D8H

(Solid: 0 °C; open: 25 °C)

Tab.S1 Fitted parameters of Dual-Site Langmuir model for CO<sub>2</sub> isotherms on MC-250D8H and NMC-250D8H at 0 and 25 °C

| Sample     |       | q <sub>sat,A</sub> | b <sub>A</sub> | q <sub>sat,B</sub> | b <sub>B</sub> |
|------------|-------|--------------------|----------------|--------------------|----------------|
| MC-250D8H  | 0 °C  | 1.263              | 20.774         | 5.464              | 1.294          |
|            | 25 °C | 1.263              | 6.210          | 5.464              | 0.420          |
| NMC-250D8H | 0 °C  | 1.096              | 70.529         | 3.062              | 2.167          |
|            | 25 °C | 1.096              | 21.936         | 3.062              | 0.808          |

Tab.S2 The calculated adsorption heats of CO<sub>2</sub> on MC-250D8H and NMC-250D8H at different adsorption loadings

| n      | ΔH <sub>ads,MC-250D8H</sub> | ΔH <sub>ads,NMC-250D8H</sub> | n      | ΔH <sub>ads,MC-250D8H</sub> | ΔH <sub>ads,NMC-250D8H</sub> |
|--------|-----------------------------|------------------------------|--------|-----------------------------|------------------------------|
| mmol/g | kJ/mmol                     | kJ/mmol                      | mmol/g | kJ/mmol                     | kJ/mmol                      |
| 0.01   | 31.17                       | 32.17                        | 2      | 27.13                       | 30.89                        |
| 0.2    | 31.02                       | 32.08                        | 2.2    | 27.01                       | 30.81                        |
| 0.4    | 30.78                       | 31.96                        | 2.4    | 26.94                       | 30.75                        |
| 0.6    | 30.42                       | 31.83                        | 2.6    | 26.88                       | 30.70                        |
| 0.8    | 29.90                       | 31.68                        | 2.8    | 26.84                       | 30.66                        |
| 1      | 29.23                       | 31.52                        | 3      | 26.81                       | 30.63                        |
| 1.2    | 28.54                       | 31.37                        | 3.2    | 26.79                       | 30.60                        |
| 1.4    | 27.97                       | 31.22                        | 3.4    | 26.77                       | 30.58                        |
| 1.6    | 27.57                       | 31.09                        | 3.6    | 26.75                       | 30.56                        |
| 1.8    | 27.30                       | 30.98                        | 3.8    | 26.74                       | 30.54                        |

### Section III: Calculation of adsorption selectivity by Ideal Adsorption Solution Theory (IAST)

IAST has been widely used to predict the mixture adsorption equilibrium by using isotherms of pure gas (*Chem. Commun.*, 2014, 50, 6894; *Energy Environ. Sci.*, 2011, 4, 2177; *J. Mater. Chem.*, 2012, 22, 10274). For the IAST application, the main requirement to be fulfilled is the availability of high quality adsorption data for each of the component, and excellent curve fitting model for such data (*Langmuir*,

2007, 23, 6431; Langmuir, 2008, 24, 8592).

In the current work, Dual-Site Langmuir (DSF) model was used to fit the pure CO<sub>2</sub> and N<sub>2</sub> isotherms because of its good fitting and simplicity as expressed by Eq.(2). The fitted equations for CO<sub>2</sub> and N<sub>2</sub> on MC-250D8H and NMC-250D8H are shown in Fig.S3 and Fig.S4, respectively.

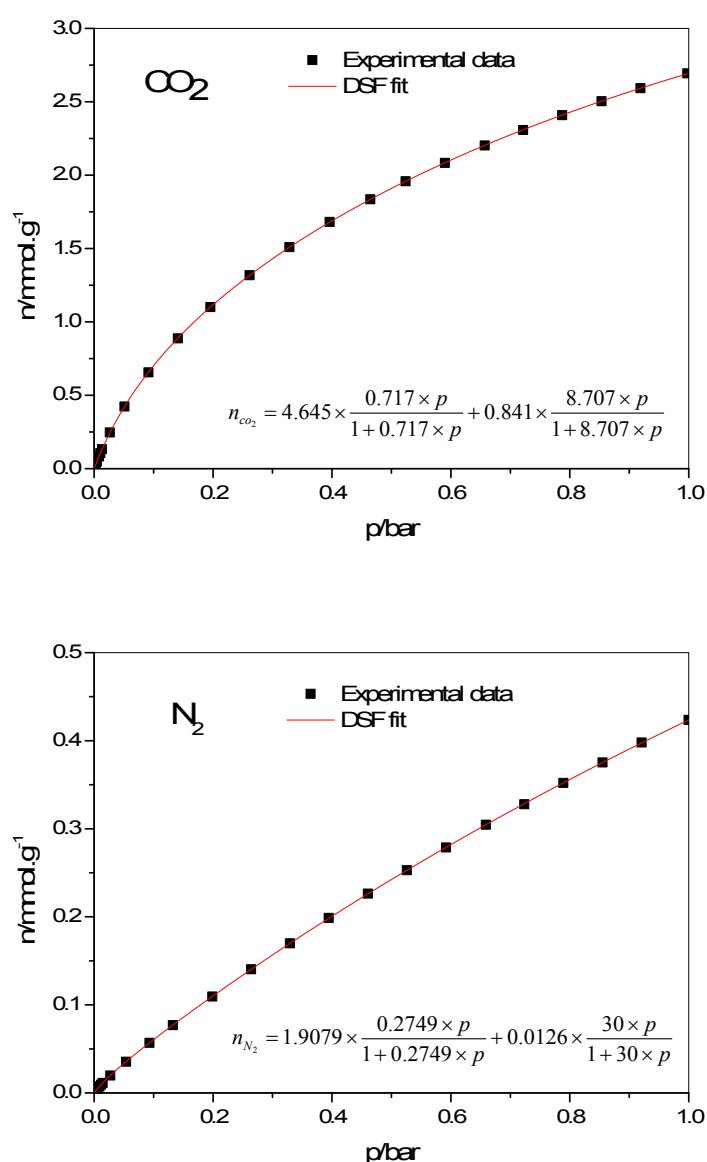

Fig.S3 CO<sub>2</sub> and N<sub>2</sub> isotherms for MC-250D8H at 298 K (black circles) and corresponding DSF fits (solid line)

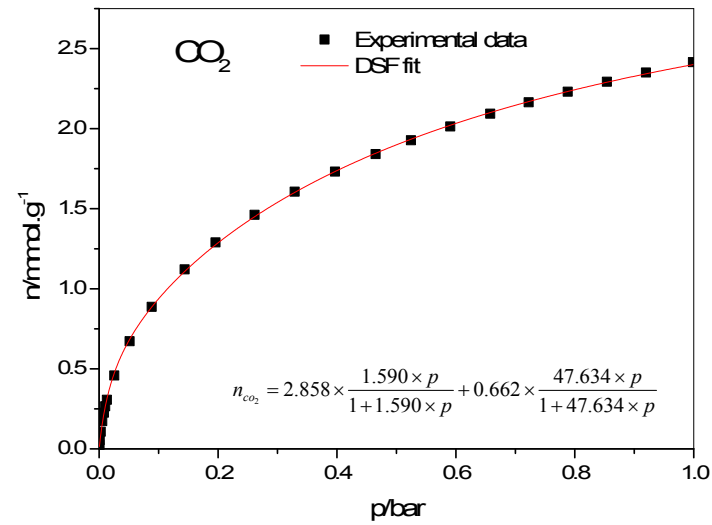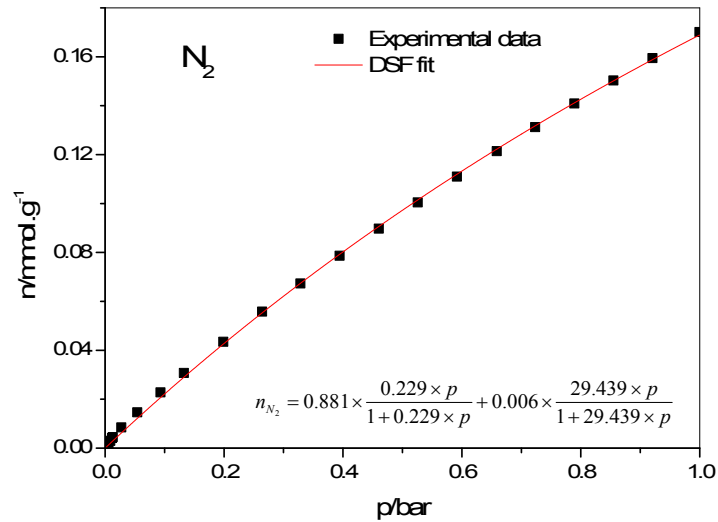

Fig.S4 CO<sub>2</sub> and N<sub>2</sub> isotherms for NMC-250D8H at 298 K (black circles) and corresponding DSF fits (solid line)

Then, the so-called spreading pressure as defined by Eq. (3) for CO<sub>2</sub> and N<sub>2</sub> in a mixture with fixed concentration and pressure can be obtained from the pure component adsorption isotherms, where  $n$  is the experimentally measured gas uptake as a function of pressure  $p$ ,  $A$  is the available surface area (assumed to be the same for all gases),  $i$  and  $j$  represent different gases,  $\pi^o$  is the so-called spreading pressure, and  $P^o$

is the equilibrium pressure of the single-component gas corresponding to  $\pi^o$

$$\pi_i^o(P_i^o) = \frac{RT}{A} \int_{p=0}^{P_i^o} \frac{n_i^o(p)}{p} dp \quad (3)$$

At equilibrium, Eq.(4) need to be fulfilled, together with Eq.(5) and Eq.(6), adsorption selectivity then can be calculated by Eq.(7).

$$Py_i = P_i^o x_i \quad (4)$$

$$\sum x_i = 1 \quad (5)$$

$$\sum y_i = 1 \quad (6)$$

$$S_{CO_2, N_2} = \frac{x_{CO_2} / y_{CO_2}}{x_{N_2} / y_{N_2}} = \frac{x_{CO_2}}{y_{CO_2}} \times \frac{1 - y_{CO_2}}{1 - x_{CO_2}} \quad (7)$$

where  $x_i$  and  $y_i$  are the adsorbed and gas phase molar fractions of gas  $i$ , respectively.

At 298 K and 1 bar, the calculated equilibrium CO<sub>2</sub> molar fractions and selectivities for MC-250D8H and NMC-250D8H at different CO<sub>2</sub> concentrations in N<sub>2</sub> are listed in Tal.S3 and Tal.S4.

Tab.S3 The calculated equilibrium CO<sub>2</sub> molar fraction in adsorbed phase and corresponding CO<sub>2</sub>/N<sub>2</sub> selectivity for MC-250D8H at different CO<sub>2</sub> concentrations in N<sub>2</sub>

|                 | 10%CO <sub>2</sub> | 15%CO <sub>2</sub> | 20%CO <sub>2</sub> | 30%CO <sub>2</sub> | 40%CO <sub>2</sub> | 50%CO <sub>2</sub> | 60%CO <sub>2</sub> | 70%CO <sub>2</sub> | 80%CO <sub>2</sub> |
|-----------------|--------------------|--------------------|--------------------|--------------------|--------------------|--------------------|--------------------|--------------------|--------------------|
| $x_{CO_2}$      | 0.692              | 0.788              | 0.846              | 0.911              | 0.946              | 0.966              | 0.979              | 0.987              | 0.993              |
| $S_{CO_2, N_2}$ | 20.22              | 21.06              | 21.97              | 23.88              | 26.28              | 28.41              | 31.08              | 32.54              | 35.46              |

Tab.S4 The calculated equilibrium CO<sub>2</sub> molar fraction in adsorbed phase and corresponding CO<sub>2</sub>/N<sub>2</sub> selectivity for NMC-250D8H at different CO<sub>2</sub> concentrations in N<sub>2</sub>

|                     | 10%CO <sub>2</sub> | 15%CO <sub>2</sub> | 20%CO <sub>2</sub> | 30%CO <sub>2</sub> | 40%CO <sub>2</sub> | 50%CO <sub>2</sub> |
|---------------------|--------------------|--------------------|--------------------|--------------------|--------------------|--------------------|
| X <sub>CO2</sub>    | 0.958              | 0.977              | 0.985              | 0.993              | 0.996              | 0.998              |
| S <sub>CO2,N2</sub> | 205.3              | 240.7              | 262.7              | 331                | 373.5              | 499                |
